# Supplementary material
Source: PubMed Central journal article supplement (PMC3129463)
Supplement: NIHMS277909-supplement-supplement_1.pdf [file NIHMS277909-supplement-supplement_1.pdf]

1 **Online Repository**  
2 **Reductions in Claudin-1 May Enhance Susceptibility to HSV-1 Infections in**  
3 **Atopic Dermatitis**

4 Anna De Benedetto, MD<sup>a</sup>, Mark K. Slifka, PhD<sup>b</sup>, Nicholas, M. Rafaels, MS<sup>c</sup>, I-  
5 Hsin Kuo, MS<sup>a</sup>, Steve N. Georas, MD<sup>d</sup>, Mark Boguniewicz, MD<sup>e</sup>, Tissa Hata, MD<sup>f</sup>,  
6 Lynda C. Schneider, MD<sup>g</sup>, Jon M. Hanifin, MD<sup>h</sup>, Richard L. Gallo, MD<sup>f</sup>, David C.  
7 Johnson, PhD<sup>b</sup>, Kathleen C. Barnes, PhD<sup>c</sup>, Donald Y. Leung, MD, PhD<sup>e</sup>, Lisa A.  
8 Beck, MD<sup>a</sup>.

9

10

11 <sup>a</sup>Department of Dermatology, University of Rochester Medical Center, Rochester,  
12 NY; <sup>b</sup>Vaccine and Gene Therapy Institute, Oregon Health & Science University,  
13 Beaverton, OR; <sup>c</sup>Johns Hopkins Asthma & Allergy Center, Johns Hopkins  
14 University School of Medicine, Baltimore, MD; <sup>d</sup>Division of Pulmonary & Critical  
15 Care Medicine, University of Rochester Medical Center, Rochester, NY;  
16 <sup>e</sup>Department of Pediatrics, National Jewish Health, Denver, CO; <sup>f</sup>Division of  
17 Dermatology, University of California San Diego, San Diego, CA; <sup>g</sup>Division of  
18 Immunology, Children's Hospital Boston, Boston, MA; <sup>h</sup>Department of  
19 Dermatology, Oregon Health & Science University, Portland, OR.

20

21 Corresponding Author: Lisa A. Beck, M.D.  
22 University of Rochester, Dept of Dermatology  
23 601 Elmwood Ave, Box 697  
24 Rochester, NY 14642  
25 Phone: 585-275-1039  
26 Fax: 585-276-2330  
27 Lisa\_Beck@URMC.ROCHESTER.EDU

28

29 **Funding:** The Atopic Dermatitis and Vaccinia Network NIH/NIAID (contract N01  
30 AI40029 and N01 AI 40033) and Atopic Dermatitis Research Network  
31 (contract HHSN272201000020C and HHSN272201000017C), National

32 Eczema Association (A.D.), the Oregon National Primate Research Center  
33 grant, RR000163 (M.K.S.) and Mary Beryl Patch Turnbull Scholar  
34 Program (K.C.B.).

35

36

37

38

39

**40 METHODS****41 Culture of Primary Human Foreskin Keratinocytes (PHK).**

42 Human keratinocytes were isolated from neonatal foreskin<sup>1</sup>. PHK were cultured  
43 in Keratinocyte-SFM (Invitrogen/Gibco) with 1% Pen/Strep, 0.2% Amphotericin B  
44 (Invitrogen/Gibco). To differentiate PHK, cells were grown in DMEM  
45 (Invitrogen/Gibco) with 10% heat-inactivated fetal bovine serum  
46 (Invitrogen/Gibco) and 1% Pen/Strep, 0.2% Amphotericin B (Invitrogen/Gibco).

47

**48 RNA Interference.**

49 PHK were plated on glass coverslips at  $2 - 3 \times 10^5$  cells/well in a 6-well plate or at  
50  $2 - 3 \times 10^4$  cells/filter in Transwell inserts (Costar; PET membrane, 0.4  $\mu\text{m}$  pore  
51 size, 6.5 mm insert) in Keratinocyte-SFM without antibiotics. Next day after  
52 plating, cells were transfected with claudin-1 specific or control (scrambled)  
53 siRNAs (Santa Cruz) using Lipofectamine<sup>TM</sup> 2000 Transfection Reagent  
54 (Invitrogen).

55

**56 HSV-1 infection of PHK.**

57 Infection studies were performed using the highly virulent HSV-1 strain F  
58 (provided by Dr. D.C. Johnson). Twenty-four to 48h post-transfection with 100  
59 nM claudin-1 or control siRNA, the cells were differentiated in DMEM with 10%  
60 heat-inactivated FBS for 24h. Cells were washed twice with HBSS and  
61 infected with HSV-1 strain F at a multiplicity of infection (MOI) of 0.1 in DMEM  
62 containing 1% heat-inactivated FBS at 37°C, with rocking every 15 min. After 2h,  
63 the viral inoculum was removed, and the cells were washed 2x with HBSS and  
64 incubated in DMEM containing 5% HI-FBS and 0.4% human- $\gamma$ -globulin (Sigma;  
65 final concentration 0.5 mg/ml) for 24 hr to neutralize any extracellular virus. It is  
66 important to note that our PHK are grown under differentiating conditions that  
67 induce functional tight junctions as demonstrated by enhanced trans epithelial  
68 resistance and reduced permeability<sup>1</sup>, but do not fully differentiate as evidenced  
69 by the lack of filaggrin expression.

70

**71 HSV-1 Fluorescent-Focus Assay.**

72 HSV-infected PHK were washed 2x with PBS and fixed in 4%  
73 formaldehyde/PBS for 20 min at room temperature. A polyclonal rabbit anti-  
74 HSV-1 (Dako) antibody diluted 1:500 in PBS/1% BSA was placed on the PHK for  
75 1h at 37°C followed by Alexa Fluor 488 donkey-anti-rabbit IgG H+L (1:1000,  
76 Molecular Probes) and 4',6-diamidino-2-phenyl-indole, dihydrochloride (DAPI)  
77 (1:10,000, Molecular Probes). Coverslips were mounted onto slides with  
78 SlowFade (Molecular Probes). For each sample, six random fields were  
79 captured at identical acquisition settings. Images were stored in Portable  
80 Network Graphics (PNG) format and analyzed computationally to objectively  
81 quantify differences in focal forming units (FFU). HSV-1 infected cells were  
82 assigned to the green channel. Cell density was calculated by counting the  
83 number of DAPI labeled nuclei, assigned to the blue channel. Images were  
84 analyzed using MATLAB to enumerate FFU, and total cell number. The following  
85 FFU measurements were also taken: Major Axis Length ( $\mu\text{m}$ ), Area ( $\mu\text{m}^2$ ), and  
86 Pixel Area (px).

87 The infected cell channel (green) was converted to a binary image using the  
88 Otsu method for threshold determination. Then a morphological closing (dilation  
89 followed by erosion) was done to reduce noise and fuse individual infected cells  
90 into colonies. Then a distance transform was computed from the binary image,  
91 followed by a watershed transform. The colony binary image was then multiplied  
92 by its watershed image, the result was dilated slightly, and its perimeter was  
93 drawn. Only cells with sizes greater than a predefined threshold were included  
94 for further analysis. The infected cell channel (green) was filtered to reduce  
95 effects of noise. The resulting image was inverted, followed by a watershed  
96 transform. The infected cell watershed image was then multiplied by the colony  
97 watershed image to identify cells within previously identified colonies. Finally, a  
98 perimeter was drawn around cell borders.

99

100 **Infectious center assay.**

101 Twenty-four hours post-infection, PHK were treated with 0.05% Trypsin -  
102 EDTA (Invitrogen/Gibco) for 5 min at 37°C followed by gently scraping to lift the  
103 cells, washed 3 times in DMEM containing 1% HI-FBS, and vortexed for 30 sec  
104 to disrupt cell clumps. Alive cells were counted using Trypan blue exclusion and  
105 scalar PHK dilutions (1000 to 1 cells in 1 ml of media) were plated onto pre-  
106 grown monolayers of Vero cells in six well plates. After 2h, 1 ml of DMEM  
107 containing 5% HI-FBS and 0.4% human- $\gamma$ -globulin (Sigma; final concentration 0.5  
108 mg/ml) was added to each well. After 3 days incubation at 37°C, cells were fixed  
109 (75% MeOH/25% acetic acid) and stained with 0.1% crystal violet. Plaques were  
110 counted by 2 independent investigators and results expressed as percent of  
111 infected PHK.

112

113 **qPCR.**

114 Reverse transcription was performed from total RNA using iScript™ cDNA  
115 Synthesis kit (Bio-Rad) according to the manufacturer's protocol. qPCR was  
116 performed using the iQ™ SYBER Green Supermix assay system from Bio-Rad  
117 Laboratories. All PCR amplifications were carried out in triplicate on an iQ5  
118 Multicolor real-time PCR detection system (Bio-Rad). Primers were designed  
119 and synthesized by Integrated DNA Technologies. Primers used in the study:  
120 **GAPDH** (forward: GAA GGT GAA GGT CGG AGT C and reverse: GAA GAT  
121 GGT GAT GGG ATT TC); **Cldn-1** (forward: CGA TGA GGT GCA GAA GAT GA  
122 and reverse: CCA GTG AAG AGA GCC TGA CC); **PVRL1** (Nectin1; forward:  
123 AGC CAT TAA GGA GAA ACG A and reverse TTC CCA ATT TCT CTG CTC T)  
124 Relative gene expression was calculated by using the  $2^{-\Delta\Delta Ct}$  method, in which Ct  
125 indicates cycle threshold, the fractional cycle number where the fluorescent  
126 signal reaches detection threshold<sup>2</sup>. The normalized Ct value of each sample  
127 was calculated using GAPDH as an endogenous control gene.

128

129 **Genetic Study Participants.**

130 DNA was isolated using standard protocols from 258 unrelated European  
131 American AD patients and 156 non-atopic healthy controls participating in the  
132 ADVN. The same set of markers was genotyped on 176 African American AD  
133 patients<sup>3</sup>. AD was diagnosed using the US consensus conference criteria<sup>4</sup>.  
134 ADEH+ was defined as AD patients with at least one EH episode documented  
135 either by an ADVN investigator (or a physician affiliated with the same academic  
136 center) or diagnosed by another physician and confirmed by PCR, tissue  
137 immunofluorescence, Tzanck smear and/or culture. AD severity was defined  
138 according to the 'eczema area and severity index' (EASI), a standardized grading  
139 system<sup>5</sup>, and total serum IgE was measured. The study was approved by the  
140 institutional review boards at National Jewish Health, Johns Hopkins University,  
141 Oregon Health & Science University, University of California San Diego,  
142 Children's Hospital of Boston and University of Rochester Medical Center. All  
143 subjects gave written informed consent prior to participation.

144

#### 145 **Genotyping and Quality Control.**

146 We performed genotyping on genomic DNA extracted from blood samples  
147 using MagAttract DNA blood Mini M48 kit (QIAGEN) on a Biorobot M48,  
148 according to the manufacturer's instructions. DNA quantification was performed  
149 using Pico-Green (Pico-green, Molecular Probes). Genotyping in these samples  
150 was determined for each of the selected tagSNPs with the Illumina GoldenGate  
151 custom panel containing 384-plex assays according to the manufacturer's  
152 protocol (Illumina Inc., San Diego, CA).

153 Tagging SNPs were selected to represent the *CLDN1* gene in both the EA  
154 and AA groups. The SNP selection approach was to examine 10 kb upstream  
155 and 10 kb downstream in accordance with design score validations based on  
156 Illumina in-house measurements and the 60-bp limitation (a SNP cannot be  
157 closer than 60 bp to another SNP on this OPA). We initially selected all available  
158 *CLDN1* SNPs from the HapMap (<http://www.hapmap.org/>) to tag the linkage  
159 disequilibrium (LD) blocks in each of the racial groups (EA and AA). Tagging  
160 was based on the LDSelect algorithm<sup>6, 7</sup>, with a minor allele frequency (MAF)

161  $\geq 10\%$  and an  $r^2$  threshold of 0.80 (as reported in HapMap) to ensure nearly  
162 perfect linkage disequilibrium (LD) in order to infer information on all SNPs  
163 captured by the tag set. A final selection included 27 SNPs (**Table E1**) chosen  
164 for the Illumina OPA. Of the 27 tagging SNPs selected, 24 qualified as tagging  
165 SNPs from both the HapMap CEPH Utah (CEU, with European ancestry) and the  
166 HapMap Yoruba (YRI, with African ancestry) samples; an additional three  
167 tagging SNPs (rs6800425, rs1155884, and rs9809713) were genotyped only in  
168 the AAs. Two LD blocks were observed among the European American group  
169 (block 1, rs10212165, rs3954259 and rs9290929 ( $D' = 0.982-1.0$ ); block 2,  
170 rs9835663 and rs3732923 ( $D' = 0.976$ ), and three LD blocks were observed  
171 among the African American group (block 1, rs3954259 and rs9290929 ( $D' =$   
172  $1.0$ ); block 2, rs893051, rs9839711 and rs9835663 ( $D' = 0.957-1.0$ ); block 3,  
173 rs6800425 and rs3774028 ( $D' = 1$ )) using the criteria of Gabriel et al<sup>8</sup>.

174 The 27 SNPs were genotyped using the custom-designed Illumina  
175 oligonucleotide pool assay (OPA) for the BeadXpress Reader System and the  
176 GoldenGate Assay with VeraCode Bead technology (San Diego, CA, USA)  
177 according to the manufacturer's protocol<sup>9</sup>. Briefly, the GoldenGate assay  
178 employs three primers designed for each locus. Two are specific to each allele  
179 at the SNP site and a third hybridizes at a downstream locus from the site. All  
180 three primers have regions complementary to both genome and universal PCR  
181 primer sites. A total of 250 ng of high quality gDNA was plated and then  
182 activated. The activated DNA, paramagnetic particles, assay oligos, and  
183 hybridization buffer are combined in a hybridization step to allow DNA to bind to  
184 the particles. Following hybridization of primers, plates were washed to reduce  
185 noise and allele specific oligos were extended and ligated to the downstream  
186 locus specific primer. This mix then served as a PCR template using the  
187 universal primers, P1, P2, and P3. P1 and P2 are Cy3 and Cy5 labeled. After  
188 down-stream processing, the single-stranded dye-labeled PCR products were  
189 hybridized to their complement VeraCode bead type. Plates were then scanned  
190 in the BeadXpress Reader for fluorescence and code identification. Scanned  
191 data and oligo assignments were uploaded into Illumina's BeadStudio software

192 for downstream genotype cluster analysis. Genotyping quality was high with an  
193 average completion rate of 97.2-98.2% for the BeadXpress genotyping.  
194 The Cochran–Armitage trend test was used to test for association between each  
195 individual marker (under an additive model) and disease status using PLINK  
196 software (<http://pngu.mgh.harford.edu/~purcell/plink/to>) and confirmed with the  
197 adaptive permutation test. Analyses were performed for subjects of European  
198 and African ancestry separately to minimize confounding due to racial differences  
199 in polymorphism frequency. We tested for association between genetic markers  
200 and total serum levels of log-adjusted IgE using recessive logistic regression  
201 models adjusted for confounding variables including age and gender.  
202 Departures from Hardy-Weinberg equilibrium at each locus were tested by  
203 means of the Chi-squared test separately for cases and controls using PLINK.  
204 Haplotype analyses were performed with PLINK using sliding windows of 2-4  
205 SNPs and the P-values for haplotype frequency differences tested by 10,000  
206 permutations.

207

208

## 209 **References**

- 210 1. De Benedetto A, Rafaels NM, McGirt LY, Ivanov AI, Georas SN, Cheadle  
211 C, et al. Tight Junctions Defects in Atopic Dermatitis. *J Allergy Clin*  
212 *Immunol* 2010; (*in press*; 10.1016/j.jaci.2010.10.018).
- 213 2. Livak KJ, Schmittgen TD. Analysis of relative gene expression data using  
214 real-time quantitative PCR and the 2(-Delta Delta C(T)) Method. *Methods*  
215 2001; 25:402-8.
- 216 3. Beck LA, Boguniewicz M, Hata T, Schneider LC, Hanifin J, Gallo R, et al.  
217 Phenotype of atopic dermatitis subjects with a history of eczema  
218 herpeticum. *J Allergy Clin Immunol* 2009; 124:260-9.
- 219 4. Eichenfield LF. Consensus guidelines in diagnosis and treatment of atopic  
220 dermatitis. *Allergy* 2004; 59 Suppl 78:86-92.



- 221 5. Hanifin JM, Thurston M, Omoto M, Cherill R, Tofte SJ, Graeber M. The  
222 eczema area and severity index (EASI): assessment of reliability in atopic  
223 dermatitis. EASI Evaluator Group. *Exp Dermatol* 2001; 10:11-8.
- 224 6. Carlson CS, Eberle MA, Rieder MJ, Yi Q, Kruglyak L, Nickerson DA.  
225 Selecting a maximally informative set of single-nucleotide polymorphisms  
226 for association analyses using linkage disequilibrium. *Am J Hum Genet*  
227 2004; 74:106-20.
- 228 7. Howie BN, Carlson CS, Rieder MJ, Nickerson DA. Efficient selection of  
229 tagging single-nucleotide polymorphisms in multiple populations. *Hum*  
230 *Genet* 2006; 120:58-68.
- 231 8. Gabriel SB, Schaffner SF, Nguyen H, Moore JM, Roy J, Blumenstiel B, et  
232 al. The structure of haplotype blocks in the human genome. *Science* 2002;  
233 296:2225-9.
- 234 9. Fan JB, Gunderson KL, Bibikova M, Yeakley JM, Chen J, Wickham Garcia  
235 E, et al. Illumina universal bead arrays. *Methods Enzymol* 2006; 410:57-  
236 73.  
237  
238

239 **Table E1.** *CLDN1* polymorphisms and minor allele frequencies (MAF)

| Gene  | dSNP ID(build 129) | Location  | Inter-SNP distance (bp) | Position | Type of Variant | MINOR ALLELE FREQUENCY |       |                                          |                                         |
|-------|--------------------|-----------|-------------------------|----------|-----------------|------------------------|-------|------------------------------------------|-----------------------------------------|
|       |                    |           |                         |          |                 | CEU*                   | YRI*  | European American <sup>#</sup> (n = 156) | African American <sup>#</sup> (n = 152) |
| CLDN1 | rs6776530          | 191498394 | 0                       | C/A      | Downstream      | 0.409                  | 0.103 | 0.384                                    | 0.431                                   |
| 3q28  | rs13092700         | 191502254 | 3860                    | A/G      | Downstream      | 0.060                  | 0.000 | 0.071                                    | 0.007                                   |
|       | rs7632915          | 191504142 | 1888                    | C/A      | Downstream      | 0.525                  | 0.192 | 0.394                                    | 0.224                                   |
|       | rs9290927          | 191505210 | 1068                    | A/T      | Downstream      | 0.883                  | 0.958 | 0.115                                    | 0.056                                   |
|       | rs17501010         | 191509348 | 4138                    | C/A      | Intron          | 0.158                  | 0.317 | 0.147                                    | 0.252                                   |
|       | rs3774032          | 191509554 | 206                     | G/A      | Intron          | 0.142                  | 0.042 | 0.210                                    | 0.059                                   |
|       | rs3774028          | 191510966 | 1412                    | T/A      | Intron          | 0.415                  | 0.034 | 0.332                                    | 0.082                                   |
|       | rs6800425          | 191513018 | 2052                    | G/A      | Intron          | 0.542                  | 0.108 | NA                                       | 0.168                                   |
|       | rs6776378          | 191513220 | 202                     | G/A      | Intron          | 0.198                  | 0.263 | 0.276                                    | 0.311                                   |
|       | rs9869263          | 191513374 | 154                     | G/A      | Coding exon     | 0.150                  | 0.280 | 0.128                                    | 0.240                                   |
|       | rs10513846         | 191513683 | 309                     | G/A      | Intron          | 0.158                  | 0.108 | 0.136                                    | 0.056                                   |
|       | rs6809685          | 191515288 | 1605                    | G/A      | Intron          | 0.833                  | 0.703 | 0.424                                    | 0.482                                   |
|       | rs9866788          | 191515814 | 526                     | A/G      | Intron          | 0.483                  | 0.208 | 0.490                                    | 0.273                                   |
|       | rs9848283          | 191516502 | 688                     | A/G      | Intron          | 0.491                  | 0.096 | 0.442                                    | 0.194                                   |
|       | rs3732923          | 191517403 | 901                     | A/T      | Intron          | 0.408                  | 0.575 | 0.410                                    | 0.493                                   |
|       | rs9835663          | 191519452 | 2049                    | G/A      | Intron          | 0.280                  | 0.250 | 0.263                                    | 0.263                                   |
|       | rs9839711          | 191519713 | 261                     | C/G      | Intron          | 0.100                  | 0.158 | 0.126                                    | 0.178                                   |
|       | rs893051           | 191522295 | 2582                    | C/G      | Intron          | 0.417                  | 0.492 | 0.455                                    | 0.535                                   |
|       | rs12696600         | 191522901 | 606                     | A/C      | 5' UTR          | 0.446                  | 0.198 | 0.457                                    | 0.287                                   |
|       | rs1155884          | 191523648 | 747                     | A/C      | Promoter        | 0.534                  | 0.458 | NA                                       | 0.431                                   |
|       | rs16865347         | 191524091 | 443                     | A/G      | Promoter        | 0.108                  | 0.085 | 0.106                                    | 0.097                                   |
|       | rs9290929          | 191526433 | 2342                    | A/G      | Promoter        | 0.433                  | 0.133 | 0.410                                    | 0.240                                   |
|       | rs3954259          | 191527201 | 768                     | G/A      | Promoter        | 0.533                  | 0.167 | 0.513                                    | 0.293                                   |
|       | rs10212165         | 191528104 | 903                     | A/G      | Promoter        | 0.150                  | 0.250 | 0.173                                    | 0.237                                   |
|       | rs16865373         | 191529502 | 1398                    | G/A      | Promoter        | 0.050                  | 0.033 | 0.062                                    | 0.051                                   |
|       | rs9809713          | 191529746 | 244                     | G/A      | Promoter        | 0.542                  | 0.492 | NA                                       | 0.496                                   |
|       | rs16865378         | 191529856 | 110                     | A/G      | Promoter        | 0.050                  | 0.000 | 0.045                                    | 0.017                                   |

240

241 <sup>#</sup>Minor allele frequencies (MAFs) from non-atopic healthy controls participating in the ADVN study.242 \*from HapMap (<http://www.hapmap.org>) for 60 Yoruba [YRI] and 60 Utah European American [CEU]

243 founders.

244

245

246 **FIGURE LEGENDS**247 **Figure E1. Knockdown of CLDN1 in human keratinocytes increases HSV-1**248 **infectivity.** Infectious center assay demonstrates that CLDN1 knockdown PHK249 were more infected with HSV-1 ( $38 \pm 6.43\%$ ;  $n=3$ ) than control transfected cells250 ( $28 \pm 7\%$ ;  $n=3$ ;  $**P=0.003$ ).

251

252 **Figure E2. Silencing of CLDN1 does not affect expression of nectin-1**253 **(PVRL1).** CLDN1 siRNA (100 nM) resulted in a 50% reduction in CLDN1254 transcripts compared to control transfected cells ( $0.5 \pm 0.6$  fold;  $*P = 0.5 \times 10^{-6}$ ;255  $n = 5$ /group). There was no effect on mRNA expression of nectin-1 (PVRL1;256  $cldn-1$  siRNA:  $0.99 \pm 0.16$  and control:  $1.1 \pm 0.14$ ;  $n = 5$ /group). Relative gene257 expressions were calculated by using the  $2^{-\Delta\Delta Ct}$  method, in which Ct indicates

258 cycle threshold, the fractional cycle number where the fluorescent signal reaches

259 detection threshold. The normalized Ct value of each sample was calculated

260 using GAPDH.

261

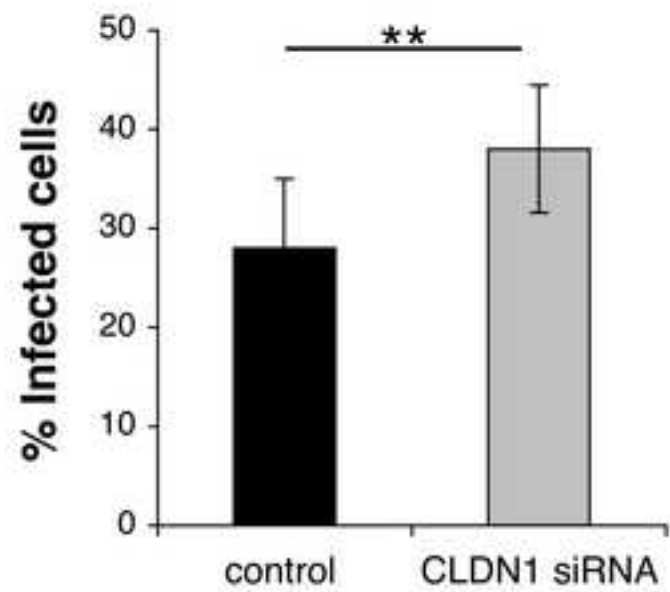

FIGURE E1

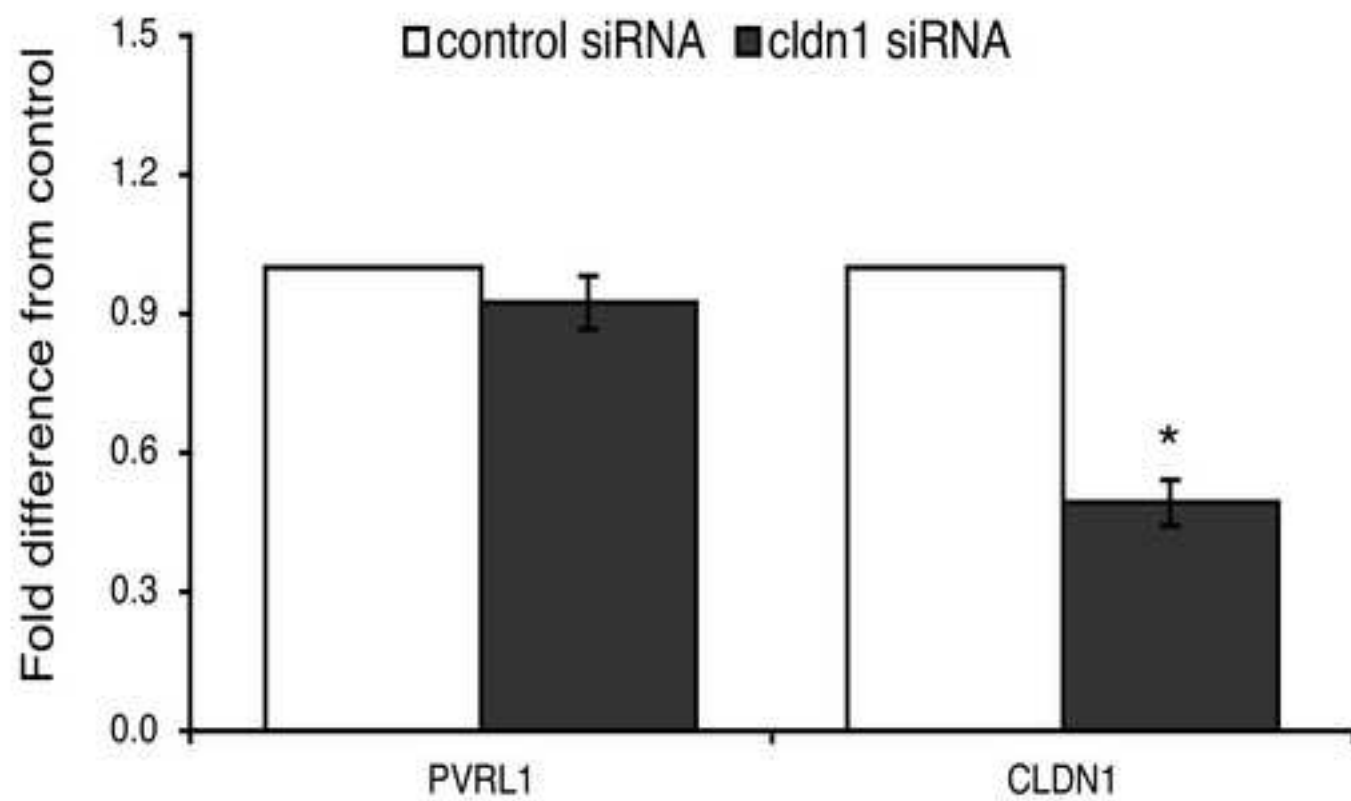

FIGURE E2
